# Supplementary material
Source: MDPI journal article supplement (https://www.mdpi.com/2073-4352/13/5/737)
Supplement: s1 [file s1]

## Supplementary materials

**Table S1.** Summary of data collection and refinement statistics.

|                                | Value                               |
|--------------------------------|-------------------------------------|
| Wavelength                     | 1.033300                            |
| Resolution range               | 44.02 - 1.602 (1.659 - 1.602)       |
| Space group                    | P 1 21 1                            |
| Unit cell                      | 63.462 127.775 79.583 90 106.883 90 |
| Total reflections              | 1095513 (108148)                    |
| Unique reflections             | 155703 (15323)                      |
| Multiplicity                   | 7.0 (7.1)                           |
| Completeness (%)               | 97.99 (96.83)                       |
| Mean I/sigma(I)                | 15.82 (2.45)                        |
| Wilson B-factor                | 17.62                               |
| R-merge                        | 0.07324 (0.7921)                    |
| R-meas                         | 0.07907 (0.8539)                    |
| R-pim                          | 0.0295 (0.3158)                     |
| CC1/2                          | 0.999 (0.825)                       |
| CC*                            | 1 (0.951)                           |
| Reflections used in refinement | 155555 (15322)                      |
| Reflections used for R-free    | 7892 (772)                          |
| R-work                         | 0.1553 (0.2301)                     |
| R-free                         | 0.1721 (0.2500)                     |
| CC(work)                       | 0.972 (0.907)                       |

|                                     |               |
|-------------------------------------|---------------|
| <b>CC(free)</b>                     | 0.964 (0.886) |
| <b>Number of non-hydrogen atoms</b> | 9928          |
| <b>macromolecules</b>               | 8440          |
| <b>ligands</b>                      | 129           |
| <b>solvent</b>                      | 1359          |
| <b>Protein residues</b>             | 1097          |
| <b>RMS(bonds)</b>                   | 0.009         |
| <b>RMS(angles)</b>                  | 1.25          |
| <b>Ramachandran favored (%)</b>     | 98.43         |
| <b>Ramachandran allowed (%)</b>     | 1.57          |
| <b>Ramachandran outliers (%)</b>    | 0.00          |
| <b>Rotamer outliers (%)</b>         | 0.81          |
| <b>Clashscore</b>                   | 4.38          |
| <b>Average B-factor</b>             | 22.99         |
| <b>macromolecules</b>               | 21.14         |
| <b>ligands</b>                      | 25.67         |
| <b>solvent</b>                      | 34.21         |

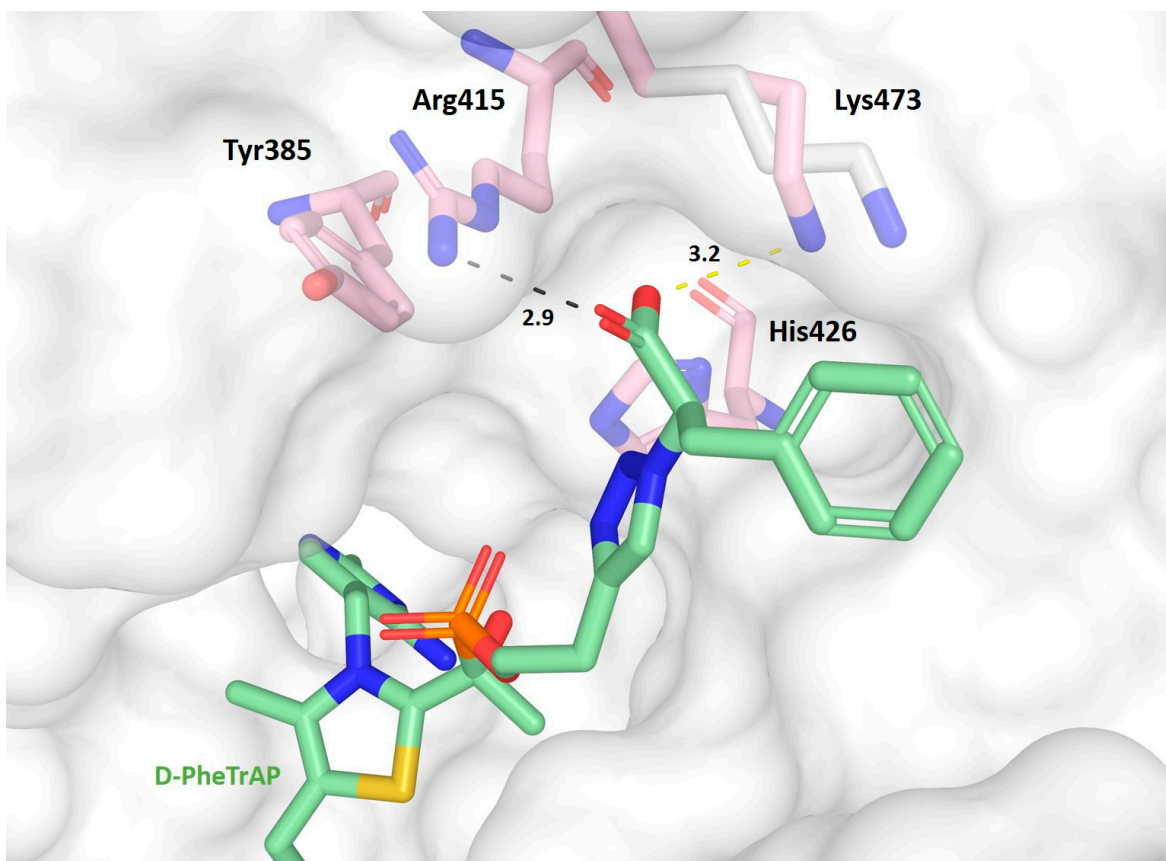

**Figure S1.** Flexible docking pose of the covalent adduct of D-PheTrAP with ThDP. The docking pose is shown as green sticks. Residues of the MtDXPS structure with the new Lys473 orientation are coloured in pink, while the original Lys473 orientation is highlighted as white sticks. Hydrogen bonds are represented as yellow dashed lines, with distances indicated in Angstroms. Distances are represented as black dashed lines, with distances indicated in Angstroms.
